# Supplementary material
Source: HighWire-hosted journal article supplement (doi:10.1101/rna.078204.120)
Supplement: Supplemental_Legends.docx [file Supplemental_Legends.docx]

**TABLES**

**Table S1: Table of all luciferase-NORAD chimera constructs.**

This table lists all constructs used in the NORAD experiments with length, SG enrichment, and predicted protein binding sites (assuming luciferase has 2 protein binding sites).

**Supplemental Table S2: Table of predicted number of RBP sites for all transcripts**

This table results from the curve fitting performed in Figure 4 and globally estimates how many RNP-SG interactions each transcript has with SGs.

**Supplemental Table S3: Plasmids and Oligos**

This table describes all plasmids used in this study, including their construction. Oligos used for plasmid construction are also listed.

**Figure S1: *Luciferase* as a reporter mRNA**

**(A)** *Luciferase* mRNA is not endogenous to mammalian cells. Non-deconvolved microscopy images showing smFISH signal in U-2 OS cells lacking genomic integration and cells with successful genomic integration. **(B)** *Luciferase*RNA is not enriched in SGs.Stress granules in blue, *luciferase* RNA in yellow (above) or demarcated by IMARIS software in white (below). **(C)** Workflow for smFISH quantification. Following imaging, single cells can be masked using IMARIS. From here, the percent of cytoplasmic *luciferase* localized to stress granules is calculated.

**Figure S2: Correlation between SG enrichment and length/GC content**

(**A**)Correlation between SG enrichment and constructs’ length. Orange diamonds are sense-NORAD constructs, light blue squares are antisense-NORAD constructs, dark green triangles are luciferase length control constructs, and black circles are all the constructs. (**B**) Correlation between SG enrichment and %GC content of the contructs. Orange diamonds are sense-NORAD constructs, light blue squares are antisense-NORAD constructs, and black circles are all the constructs.

**Figure S3: Correlation between G3BP intensity and *luciferase* SG enrichment**

(**A**)Correlation between SG enrichment of *luciferase* with 7 BoxB and expression level of G3BP1-GFP-λN. (**B**) Correlation between SG enrichment of *luciferase* with 25 BoxB and expression level of G3BP1-GFP-λN.

**Figure S4: Mathematical modeling of RBP interactions**

**(A)** Violin plots showing the distribution of SG enrichment for luciferase reporters with varying numbers of BoxB sites when tethered to G3BP **(B)** Same as A, but for TIA1 tethering experiments. **(C)** Logarithmic transformations of data used to perform curve fitting for G3BP tethering experiments (each line represents a different value for n). Pearson’s r values from this analysis can be found in Figure 4A. **(D)** Logarithmic transformations of data used to perform curve fitting for TIA tethering experiments (each line represents a different value for n). Pearson’s r values from this analysis can be found in Figure 4B.

**Figure S5: CLIP analysis of NORAD RBP interactions**

**(A)** Schematic depicting how RBP CLIP analysis was performed. **(B)** *Top:*Clustered heatmap depicting RBP CLIP sites for each 1/8th of the NORAD transcript. *Bottom:* Barplots showing percentage of transcripts enriched in stress granules. **(C)** Scatterplot showing SG enrichment vs. number of summed SG CLIP sites.

**Figure S6: Total RNA and SG core purification via PABPC1 pulldown under arsenite stress yields reproducible transcriptomes**

Pairwise scatterplots and Pearson correlations for PABPC1 SG immunopurification and total RNA replicates during arsenite treatment**.**

**Figure S7: SG cores purified with G3BP immunopurification are enriched for longer RNAs with decreased translation efficiency scores and longer poly-A tails**

Histograms of **(A)** transcript length, **(B)** translation efficiency, and **(C)** poly-A tail length of SG enriched and depleted transcripts from G3BP1-GFP immunopurification of arsenite-induced SGs (Khong et al. 2017).

**Figure S8: Total RNA and SG core purification via G3BP1-GFP pulldown under sorbitol stress yields reproducible transcriptomes**

Pairwise scatterplots and Pearson correlations for G3BP SG immunopurification and total RNA replicates during sorbitol treatment**.**

**Figure S9: Total RNA and SG core purification via PABPC1 pulldown under sorbitol stress yields reproducible transcriptomes**

Pairwise scatterplots and Pearson correlations for PABPC1 SG immunopurification and total RNA replicates during sorbitol treatment**.**

**Figure S10: Total RNA and SG core purification from ΔΔG3BP1/2 cells via PABPC1 pulldown under sorbitol stress yields reproducible transcriptomes**

Pairwise scatterplots and Pearson correlations for PABPC1 SG immunopurification and total RNA replicates during sorbitol treatment in ΔΔG3BP1/2 cells**.**

**Figure S11: Analysis of the change in SG enrichment scores in G3BP deletion cells as a function of the number of G3BP CLIP sites.**

**(A)** ΔΔG3BP1/2 SG enrichment – wild type SG enrichment vs. number of G3BP CLIP sites. **(B)** Same as A, but only for transcripts < 3 kb.

**Figure S12: Synergistic recruitment of mRNPs to SGs based on the number of SG interactions**

Model for RNA recruitment for stress granules. ***Left:*** Tethering, e.g. G3BP to RNAs that contain few SG interactions, can increase an RNA’s association with stress granules. ***Right:*** Deletion of individual interactions from RNPs with many interactions with stress granules leads to limited changes in RNA recruitment to SGs since other interactions can compensate.
