# Supplementary material
Source: HighWire-hosted journal article supplement (doi:10.1101/rna.078204.120)
Supplement: Supplemental_Table_S3_TH.xlsx [file Supplemental_Table_S3_TH.xlsx]

## Sheet: Plasmids
Plasmid Number	Description	Construction Notes
pRP2854	CRISPR/Cas9 plasmid for targeting to AAVS locus	Gift from Dan Youmans in Tom Cech lab
pRP2855	AAVS TDP43	Gift from Josh Wheeler in Parker Lab
pRP2856	AAVS Luciferase	PCR off of Addgene 64127 with oBVT164 and oBVT165. Cut pRP2855 with NotI and BglII. In Fusion.
pRP2871	Tet-Luciferase 7 BoxB	PCR off of Addgene 60817 with oBVT255 and oBVT256. Amplify Addgene 64127 with oBVT123 and oBVT179. PCR off insert gave smear. In Fusion cloning. Isolate colony that had 7 inserts.
pRP2873	AAVS Luciferase 7 BoxB	PCR off pRP2871 with oBVT174 and oBVT259. Cup pRP2855 with NotI and BglII. Gibson assembly.
pRP2874	AAVS Luciferase 25 BoxB	PCR off pRP2856 with oBVT316 and oBVT317. Cut Addgene 60817 with SacI and SmaI. Gibson assembly.
pRP2940	G3BP-GFP-LN	Gift from Richard Lloyd lab.
pRP2941	GFP-LN	Gift from Richard Lloyd lab.
pRP2944	FMRP-GFP-LN	PCR amplify Addgene 48690 with oBVT297 and oBVT298. Cut pRP2940 with EcoRI and BamHI. Gibson assembly.
pRP2877	Tet-Luciferase with FL NORAD in 3'UTR	PCR off Addgene 64127 with oBVT122 anbd 123 for Vector. PCR off cDNA NORAD with oBVT231 and oBVT232 for insert. Gibson cloning
pRP2878	Tet-Luciferase with 5' half of NORAD in 3'UTR	PCR off Addgene 64127 with oBVT122 anbd 123 for Vector. PCR off cDNA NORAD with oBVT231 and oBVT234 for insert. Gibson cloning
pRP2879	Tet-Luciferase with 3' half of NORAD in 3'UTR	PCR off Addgene 64127 with oBVT122 and 123 for Vector. PCR off cDNA NORAD with oBVT233 and oBVT232. Gibson cloning.
pRP2880	Tet-Luciferase with 1/4 NORAD in 3'UTR	PCR off Addgene 64127 with oBVT122 and 123 for Vector. PCR off cDNA NORAD with oBVT231 and oBVT273. Gibson cloning.
pRP2881	Tet-Luciferase with 2/4 NORAD in 3'UTR	PCR off Addgene 64127 with oBVT122 and 123 for Vector. PCR off cDNA NORAD with oBVT275 and oBVT234. Gibson cloning.
pRP2882	Tet-Luciferase with 3/4 NORAD in 3'UTR	PCR off Addgene 64127 with oBVT122 and 123 for Vector. PCR off cDNA NORAD with oBVT233 and oBVT277. Gibson cloning.
pRP2883	Tet-Luciferase with 4/4 NORAD in 3'UTR	PCR off Addgene 64127 with oBVT122 and 123 for Vector. PCR off cDNA NORAD with oBVT279 and oBVT232. Gibson cloning.
pRP2884	Tet-Luciferase with 1/8 NORAD in 3'UTR	PCR off Addgene 64127 with oBVT122 and 123 for Vector. PCR off cDNA NORAD with oBVT231 and oBVT281. Gibson cloning.
pRP2885	Tet-Luciferase with 2/8 NORAD in 3'UTR	PCR off Addgene 64127 with oBVT122 and 123 for Vector. PCR off cDNA NORAD with oBVT283 and oBVT273. Gibson cloning.
pRP2886	Tet-Luciferase with 3/8 NORAD in 3'UTR	PCR off Addgene 64127 with oBVT122 and 123 for Vector. PCR off cDNA NORAD with oBVT275 and oBVT285. Gibson cloning.
pRP2887	Tet-Luciferase with 4/8 NORAD in 3'UTR	PCR off Addgene 64127 with oBVT122 and 123 for Vector. PCR off cDNA NORAD with oBVT287 and oBVT234. Gibson cloning.
pRP2888	Tet-luciferase with 5/8 NORAD in 3'UTR	PCR off Addgene 64127 with oBVT122 and 123 for Vector. PCR off cDNA NORAD with oBVT233 and oBVT289. Gibson cloning.
pRP2889	Tet-luciferase with 6/8 NORAD in 3'UTR	PCR off Addgene 64127 with oBVT122 and 123 for Vector. PCR off cDNA NORAD with oBVT291 and oBVT277. Gibson cloning.
pRP2890	Tet-Luciferase with 7/8 NORAD in 3'UTR	PCR off Addgene 64127 with oBVT122 and 123 for Vector. PCR off cDNA NORAD with oBVT279 and oBVT293. Gibson cloning.
pRP2891	Tet-Luciferase with 8/8 NORAD in 3'UTR	PCR off Addgene 64127 with oBVT122 and 123 for Vector. PCR off cDNA NORAD with oBVT295 and oBVT232. Gibson cloning.
pRP2909	Tet-Luciferase with AS 2/2 of NORAD in 3'UTR	PCR off Addgene 64127 with oBVT122 and 123 for Vector. PCR off cDNA NORAD with oBVT254 and oBVT251. Gibson cloning.
pRP2910	Tet-Luciferase with AS 1/4 NORAD in 3'UTR	PCR off Addgene 64127 with oBVT122 and 123 for Vector. PCR off cDNA NORAD with oBVT252 and oBVT274. Gibson cloning.
pRP2911	Tet-Luciferase with AS 2/4 NORAD in 3'UTR	PCR off Addgene 64127 with oBVT122 and 123 for Vector. PCR off cDNA NORAD with oBVT276 and oBVT253. Gibson cloning.
pRP2912	Tet-Luciferase with AS 3/4 NORAD in 3'UTR	PCR off Addgene 64127 with oBVT122 and 123 for Vector. PCR off cDNA NORAD with oBVT254 and oBVT278. Gibson cloning.
pRP2913	Tet-Luciferase with AS 4/4 NORAD in 3'UTR	PCR off Addgene 64127 with oBVT122 and 123 for Vector. PCR off cDNA NORAD with oBVT280 and oBVT251. Gibson cloning.
pRP2914	Tet-Luciferase with AS 1/8 NORAD in 3'UTR	PCR off Addgene 64127 with oBVT122 and 123 for Vector. PCR off cDNA NORAD with oBVT252 and oBVT282. Gibson cloning.
pRP2915	Tet-Luciferase with AS 2/8 NORAD in 3'UTR	PCR off Addgene 64127 with oBVT122 and 123 for Vector. PCR off cDNA NORAD with oBVT284 and oBVT274. Gibson cloning.
pRP2916	Tet-Luciferase with AS 3/8 NORAD in 3'UTR	PCR off Addgene 64127 with oBVT122 and 123 for Vector. PCR off cDNA NORAD with oBVT276 and oBVT286. Gibson cloning.
pRP2917	Tet-Luciferase with AS 4/8 NORAD in 3'UTR	PCR off Addgene 64127 with oBVT122 and 123 for Vector. PCR off cDNA NORAD with oBVT288 and oBVT253. Gibson cloning.
pRP2918	Tet-Luciferase with AS 5/8 NORAD in 3'UTR	PCR off Addgene 64127 with oBVT122 and 123 for Vector. PCR off cDNA NORAD with oBVT254 and oBVT290. Gibson cloning.
pRP2919	Tet-Luciferase with AS 6/8 NORAD in 3'UTR	PCR off Addgene 64127 with oBVT122 and 123 for Vector. PCR off cDNA NORAD with oBVT292 and oBVT278. Gibson cloning.
pRP2920	Tet-Luciferase with AS 7/8 NORAD in 3'UTR	PCR off Addgene 64127 with oBVT122 and 123 for Vector. PCR off cDNA NORAD with oBVT280 and oBVT294. Gibson cloning.
pRP2921	Tet-Luciferase with AS 8/8 NORAD in 3'UTR	PCR off Addgene 64127 with oBVT122 and 123 for Vector. PCR off cDNA NORAD with oBVT279 and oBVT251. Gibson cloning.
pRP2892	AAVS with FL NORAD in 3'UTR of luc	PCR off pRP2877 with oBVT164 and 248 for insert. Cut pRP2855 with NotI and BglII. In Fusion/Gibson to clone sections together.
pRP2893	AAVS with 5' half of NORAD in 3'UTR	PCR off pRP2878 with oBVT164 and 258 for insert. Cut pRP2855 with NotI and BglII. In Fusion/Gibson to clone sections together.
pRP2894	AAVS with 3'half of NORAD in 3'UTR	PCR off pRP2879 with oBVT164 and 249 for insert. Cut pRP2855 with NotI and BglII. In Fusion/Gibson to clone sections together.
pRP2895	AAVS with 1/4 NORAD in 3'UTR	PCR off pRP2880 with oBVT164 and 300 for insert. Cut pRP2855 with NotI and BglII. In Fusion/Gibson to clone sections together.
pRP2896	AAVS with 2/4 NORAD in 3'UTR	PCR off pRP2881 with oBVT164 and 249 for insert. Cut pRP2855 with NotI and BglII. In Fusion/Gibson to clone sections together.
pRP2897	AAVS with 3/4 NORAD in 3'UTR	PCR off pRP2882 with oBVT164 and 303 for insert. Cut pRP2855 with NotI and BglII. In Fusion/Gibson to clone sections together.
pRP2898	AAVS with 4/4 NORAD in 3'UTR	PCR off pRP2883 with oBVT164 and 248 for insert. Cut pRP2855 with NotI and BglII. In Fusion/Gibson to clone sections together.
pRP2899	AAVS with 1/8 NORAD in 3'UTR	PCR off pRP2884 with oBVT164 and 299 for insert. Cut pRP2855 with NotI and BglII. In Fusion/Gibson to clone sections together.
pRP2900	AAVS with 2/8 NORAD in 3'UTR	PCR off pRP2885 with oBVT164 and 300 for insert. Cut pRP2855 with NotI and BglII. In Fusion/Gibson to clone sections together.
pRP2901	AAVS with 3/8 NORAD in 3'UTR	PCR off pRP2886 with oBVT164 and 301 for insert. Cut pRP2855 with NotI and BglII. In Fusion/Gibson to clone sections together.
pRP2902	AAVS with 4/8 NORAD in 3'UTR	PCR off pRP2887 with oBVT164 and 249 for insert. Cut pRP2855 with NotI and BglII. In Fusion/Gibson to clone sections together.
pRP2903	AAVS with 5/8 NORAD in 3'UTR	PCR off pRP2888 with oBVT164 and 302 for insert. Cut pRP2855 with NotI and BglII. In Fusion/Gibson to clone sections together.
pRP2904	AAVS with 6/8 NORAD in 3'UTR	PCR off pRP2889 with oBVT164 and 303 for insert. Cut pRP2855 with NotI and BglII. In Fusion/Gibson to clone sections together.
pRP2905	AAVS with 7/8 NORAD in 3'UTR	PCR off pRP2890 with oBVT164 and 304 for insert. Cut pRP2855 with NotI and BglII. In Fusion/Gibson to clone sections together.
pRP2906	AAVS with 8/8 NORAD in 3'UTR	PCR off pRP2891 with oBVT164 and 248 for insert. Cut pRP2855 with NotI and BglII. In Fusion/Gibson to clone sections together.
pRP2924	AAVS with AS 2/2 of NORAD in 3'UTR	PCR off pRP2909 with oBVT164 and 258 for insert. Cut pRP2855 with NotI and BglII. In Fusion/Gibson to clone sections together.
pRP2925	AAVS with AS 1/4 NORAD in 3'UTR	PCR off pRP2910 with oBVT164 and 257 for insert. Cut pRP2855 with NotI and BglII. In Fusion/Gibson to clone sections together.
pRP2926	AAVS with AS 2/4 NORAD in 3'UTR	PCR off pRP2911 with oBVT164 and 306 for insert. Cut pRP2855 with NotI and BglII. In Fusion/Gibson to clone sections together.
pRP2927	AAVS with AS 3/4 NORAD in 3'UTR	PCR off pRP2912 with oBVT164 and 258 for insert. Cut pRP2855 with NotI and BglII. In Fusion/Gibson to clone sections together.
pRP2928	AAVS with AS 4/4 NORAD in 3'UTR	PCR off pRP2913 with oBVT164 and 309 for insert. Cut pRP2855 with NotI and BglII. In Fusion/Gibson to clone sections together.
pRP2929	AAVS with AS 1/8 NORAD in 3'UTR	PCR off pRP2914 with oBVT164 and 257 for insert. Cut pRP2855 with NotI and BglII. In Fusion/Gibson to clone sections together.
pRP2930	AAVS with AS 2/8 NORAD in 3'UTR	PCR off pRP2915 with oBVT164 and 305 for insert. Cut pRP2855 with NotI and BglII. In Fusion/Gibson to clone sections together.
pRP2931	AAVS with AS 3/8 NORAD in 3'UTR	PCR off pRP2916 with oBVT164 and 306 for insert. Cut pRP2855 with NotI and BglII. In Fusion/Gibson to clone sections together.
pRP2932	AAVS with AS 4/8 NORAD in 3'UTR	PCR off pRP2917 with oBVT164 and 307 for insert. Cut pRP2855 with NotI and BglII. In Fusion/Gibson to clone sections together.
pRP2933	AAVS with AS 5/8 NORAD in 3'UTR	PCR off pRP2918 with oBVT164 and 258 for insert. Cut pRP2855 with NotI and BglII. In Fusion/Gibson to clone sections together.
pRP2934	AAVS with AS 6/8 NORAD in 3'UTR	PCR off pRP2919 with oBVT164 and 308 for insert. Cut pRP2855 with NotI and BglII. In Fusion/Gibson to clone sections together.
pRP2935	AAVS with AS 7/8 NORAD in 3'UTR	PCR off pRP2920 with oBVT164 and 309 for insert. Cut pRP2855 with NotI and BglII. In Fusion/Gibson to clone sections together.
pRP2936	AAVS with AS 8/8 NORAD in 3'UTR	PCR off pRP2921 with oBVT164 and 310 for insert. Cut pRP2855 with NotI and BglII. In Fusion/Gibson to clone sections together.
pRP2937	AAVS with FL luciferase in 3'UTR of luciferase	PCR off pRP2856 with oBVT311 and oBVT312. Cut pRP2856 with Not1. Gibson assembly
pRP2938	AAVS with 1300nt luciferase in 3'UTR of luciferase	PCR off pRP2856 with oBVT311 and oBVT313. Cut pRP2856 with Not1. Gibson assembly
pRP2939	AAVS with 660nt luciferase in 3'UTR of luciferase	PCR off pRP2856 with oBVT311 and oBVT314. Cut pRP2856 with Not1. Gibson assembly
pRP2993	Tet-Luciferase with NORAD-PREmut in 3'UTR	PCR off Addgene 64127 with oBVT122 anbd 123 for Vector. PCR off cDNA NORAD-PREmut from Josh Mendel's lab with oBVT231 and oBVT232 for insert. Gibson cloning
pRP2994	AAVS with 2xluciferase in 3'UTR of luciferase	PCR off pRP2937 with oBVT311 and oBVT312. Extract the right-size band. Cut pRP2856 with Not1. Gibson assembly
pRP2995	AAVS with 3xluciferase in 3'UTR of luciferase	PCR off pRP2994 with oBVT311 and oBVT312. Extract the right-size band. Cut pRP2856 with Not1. Gibson assembly
pRP2996	G3BP-HaloTag-LN
pRP2997	FMRP-HaloTag-LN
pRP2998	TIA1-HaloTag-LN
pRP2999	HaloTag-LN
Addgene 64127	Tet-inducible luciferase reporter
Addgene 60817	pCMV5-25BoxB
Addgene 48690	pFRT-TODestFLAGHAhFMRPiso1

## Sheet: Oligos
Oligo	Sequence
oBVT123	ATAAGATCTTTACTTCTTGGC
oBVT164	gagaattggctagcagatctGGTACCGAATTCGCCACCAT
oBVT165	gatccctcgaggagcggccgcCTGCTTTAATAAGATCTTTACTTCTTGGC
oBVT174	TAGTTGTGGGGGAGGAAGT
oBVT179	TAAAGCAGGCGGCCG
oBVT255	ccaagaagtaaagatcttatCGTTTAGTGAACCGTCAG
oBVT256	aataaacaagttctgctttaGGATCCAGATAATATCCTCG
oBVT259	gatccctcgaggagcggccgcCTGCTTTAGGATCCAGATAATATCC
oBVT297	gatctcgagctcaagcttcgaattcATGGAGGAGCTGGTGGTG
oBVT298	atggtggcgaccggccggtggatccCGGGTACTCCATTCACGAG
oBVT316	gaggatattatctggatcccTAAAGCAGGCGGCCGCTC
oBVT317	gacggttcactaaacgagctATAAGATCTTTACTTCTTGGCCTTAATGAGAATCTCG
oBVT122	TAAAGCAGAACTTGTTTATTGCAG
oBVT231	ccaagaagtaaagatcttatAGTTCCGGTCCGGCAGAG
oBVT232	aataaacaagttctgctttaGGAAATTGAAAAACACAAGCAAAGAACAAAG
oBVT233	ccaagaagtaaagatcttatTATTGTATATATAACGGACAAATTAGTCCC
oBVT234	aataaacaagttctgctttaTATACAGTATAGCAAAGTTAAATGAAATGCATGTAACATATAC
oBVT273	aataaacaagttctgctttaACAATGAGTATTACTCAACAGGTGATTTG
oBVT274	ccaagaagtaaagatcttatACAATGAGTATTACTCAACAGGTGATTTG
oBVT275	ccaagaagtaaagatcttatGTTTGTGCAGTGGTTCAGGG
oBVT276	aataaacaagttctgctttaGTTTGTGCAGTGGTTCAGGG
oBVT277	aataaacaagttctgctttaAACCTACATTGTGCACTTTTTTTTTTG
oBVT278	ccaagaagtaaagatcttatAACCTACATTGTGCACTTTTTTTTTTG
oBVT279	ccaagaagtaaagatcttatAACAGTAGAGGGCTTAAGTAACAC
oBVT280	aataaacaagttctgctttaAACAGTAGAGGGCTTAAGTAACAC
oBVT281	aataaacaagttctgctttaAGCAAAGTCTGGTAGAATGAAGACC
oBVT282	ccaagaagtaaagatcttatAGCAAAGTCTGGTAGAATGAAGACC
oBVT283	ccaagaagtaaagatcttatGTCGGAAGAGAGAAATGGTAGAATG
oBVT284	aataaacaagttctgctttaGTCGGAAGAGAGAAATGGTAGAATG
oBVT285	aataaacaagttctgctttaTATGAACACACTAGTAATATTACCTTTTGC
oBVT286	ccaagaagtaaagatcttatTATGAACACACTAGTAATATTACCTTTTGC
oBVT287	ccaagaagtaaagatcttatCTTGGACATTTTCAGACACCATTTTTC
oBVT288	aataaacaagttctgctttaCTTGGACATTTTCAGACACCATTTTTC
oBVT289	aataaacaagttctgctttaCTCCTATGTCCGCTTATATACACTATATAC
oBVT290	ccaagaagtaaagatcttatCTCCTATGTCCGCTTATATACACTATATAC
oBVT291	ccaagaagtaaagatcttatTCCTAATTTACGTCTAGTCGATGTTAAAAAG
oBVT292	aataaacaagttctgctttaTCCTAATTTACGTCTAGTCGATGTTAAAAAG
oBVT293	aataaacaagttctgctttaTCCTATCAATTATAACAAAGGTATTTACAAATAG
oBVT294	ccaagaagtaaagatcttatTCCTATCAATTATAACAAAGGTATTTACAAATAG
oBVT295	ccaagaagtaaagatcttatTACATCTTGGACATGGAATTGTTAAGC
oBVT296	aataaacaagttctgctttaTACATCTTGGACATGGAATTGTTAAGC
oBVT164	gagaattggctagcagatctGGTACCGAATTCGCCACCAT
oBVT299	gatccctcgaggagcggccgcCTGCTTTAAGCAAAGTCTGG
oBVT300	gatccctcgaggagcggccgcCTGCTTTAACAATGAGTATTACTCAACAGGTG
oBVT301	gatccctcgaggagcggccgcCTGCTTTATATGAACACACTAGTAATATTACC
oBVT302	gatccctcgaggagcggccgcCTGCTTTACTCCTATGTCCGCTTATATAC
oBVT303	gatccctcgaggagcggccgcCTGCTTTAAACCTACATTGTGCACTTTTTTTTTTG
oBVT304	gatccctcgaggagcggccgcCTGCTTTATCCTATCAATTATAACAAAGGTATTTACAAATAG
oBVT305	gatccctcgaggagcggccgcCTGCTTTAGTCGGAAGAGAGAAATGG
oBVT306	gatccctcgaggagcggccgcCTGCTTTAGTTTGTGCAGTGGTTC
oBVT307	gatccctcgaggagcggccgcCTGCTTTACTTGGACATTTTCAGACACC
oBVT308	gatccctcgaggagcggccgcCTGCTTTATCCTAATTTACGTCTAGTCGATG
oBVT309	gatccctcgaggagcggccgcCTGCTTTAAACAGTAGAGGGCTTAAGTAAC
oBVT310	gatccctcgaggagcggccgcCTGCTTTATACATCTTGGACATGGAATTGTTAAG
oBVT311	gatcttattaaagcaggcggGAAGATGCCAAAAACATTAAG
oBVT312	gtggatccctcgaggagcggCTTCTTGGCCTTAATGAG
oBVT313	gtggatccctcgaggagcggATCAGGCTCTTCAGCCGG
oBVT314	gtggatccctcgaggagcggCATGACTGAATCGGACAC
oBVT248	gatccctcgaggagcggccgcCTGCTTTAGGAAATTGAAAAACAC
oBVT249	atccctcgaggagcggccgcCTGCTTTATATACAGTATAGCAAAG
oBVT254	aataaacaagttctgctttaTATTGTATATATAACGGACAAATTAGTC
oBVT258	gatccctcgaggagcggccgcCTGCTTTATATTGTATATATAACGGACAAATTAG
